# Supplementary material
Source: PubMed Central journal article supplement (PMC3447125)
Supplement: NIHMS383396-supplement-Supp_Material.pdf [file NIHMS383396-supplement-Supp_Material.pdf]

## **Supplementary Materials**

### **Methods:**

#### **Candidate Gene Analysis: SNP-by-Sex Interaction**

We also tested eighty-two previously reported BMD-associated SNPs identified through a meta-analysis of 83,894 subjects (1) for SNP-by-sex interactions. This hypothesis-driven analysis also afforded us the opportunity to focus on the most promising SNPs from the BMD GEFOS II meta-analysis while reducing the penalty due to multiple testing (1). In addition, this sex by SNP interaction analysis offered an opportunity to determine whether the reason for 26 of those SNPs not replicating in the GEFOS II BMD meta-analysis could have been attributed to sex-specificity.

#### **Functional Interaction Network:**

Studies have suggested that genes under the same linkage analysis peak, and genes with similar expression profiles are related within hierarchical genetic networks or pathways (2). To further understand the potential functions of the genes annotated to the most significant SNPs in our analyses, we focused on their functional interactions with sex hormones (specifically  $\beta$ -estradiol and testosterone), and Wnt signaling pathway members, because these pathways are critical in skeletal development, which is when skeletal features begin to differ between the sexes. We constructed functional interaction networks using Ingenuity Pathways Analysis (IPA) (Ingenuity, Redwood City, CA). The Ingenuity database is a knowledge repository of networks and biological relationships that have been systematically encoded into ontology based on more than 200,000 original peer-reviewed articles on mammalian biology. Details are available in the IPA Web site ([www.ingenuity.com](http://www.ingenuity.com)). Direct molecular interactions and regulatory events among

genes/proteins have been manually extracted and curated from full text peer-reviewed articles of experimental findings in human, mice and rats to create the IPA database.

The details of the algorithm used to construct networks has been described elsewhere (3). In brief, after annotating the SNPs from each of our top SNP-sex interaction GWAS associations to a gene, we overlaid results onto a global molecular network from the Ingenuity database to form a sub-network. With the assumption of biological commonalities among top associated genes for a specific disease, sub-networks are then combined into small-networks that maximize their specific connectivity, which is a reflection of their interconnectedness with each other relative to all molecules they are connected to in the Ingenuity database. Additional molecules from the Ingenuity database are used to connect small-networks by merging them into a larger one. The finalized functional interaction networks are limited up to 35 molecules (genes/proteins) each to keep them to a usable size. A graphical network of the functional relationships between gene/gene products was extracted. Genes/gene products are represented as nodes, and the biological relationship between two nodes is represented as an edge (line). Nodes are displayed using various shapes that represent the functional class of the gene products. Edges are displayed with various labels that describe the nature of the relationship between the nodes. Statistical significance was calculated as a p-value of the probability of the genes forming a specific network in comparison to all possible networks, with the right-tailed Fisher's Exact Test based on the hypergeometric distribution.

### **Results:**

#### ***Candidate Gene Analysis of SNP-by-Sex for Previously Reported SNPs***

Supplementary Table 3 displays results for previously reported BMD-associated SNPs that demonstrated a significant interaction signal. One SNP, rs344081 (in *FLJ16641*), showed a

significant sex interaction for FNBMD, however it should be noted that none of these SNPs from discovery were successfully replicated. The results for the complete list of BMD-related loci are presented in Supplementary Table S3.

### **Functional Interaction Networks with Sex Hormones & Wnts**

We constructed functional interaction networks using 10 of the final 12 gene-sex interaction loci (see main paper table 1) with functional information along with sex hormone relevant proteins and genes. Due to lack of biological or functional annotation, *RELL1* and *C4orf32* were excluded from analyses. A functional interaction network that linked to  $\beta$ -estradiol was constructed (**Supplementary Figure S3**), and we found that 8 out of 10 gene-sex interaction genes were physically (*GALR1* and *SERPINA1*) interacting with or indirectly linked to (*DOCK5*, *GRM7*, *MAT2B*, *TYRP1*, *UBE4B* and *UGCG* genes)  $\beta$ -estradiol ( $p=10^{-25}$ ). The indirect links between *DOCK5*, *GRM7*, *MAT2B*, *TYRP1*, *UBE4B* and *UGCG* genes and  $\beta$ -estradiol are through their direct interaction with PPP2CA, TGFB1, SP1, TP53 and TNF molecules (gene, mRNA or protein). For example, UBE4B has been found to negatively regulate the level of p53 and to inhibit p53-dependent transactivation and apoptosis (4). Based on chromatin immunoprecipitation assays, studies found p53 to be recruited to the Estrogen Receptor (ER)- $\alpha$  promoter along with other transcription factors, such as CARM1, CBP, c-Jun, and Sp1 and that this complex was formed in a p53-dependent manner, which suggests that p53 regulates ER expression through transcriptional control of the ER promoter (5).  $\beta$ -estradiol increases expression of human SERPINA1 mRNA (6). Estradiol and progesterone also have been shown to decrease expression of rat Galr1 mRNA (5).

We also constructed functional interaction networks with the same 10 gene-sex interaction loci (excl. *RELL1* and *C4orf32* as above) along with Wnt signaling pathway. As is shown in the functional interaction network (**Supplementary Figure S4**), *UGCG*, *TYRPI* and *SERPINA1* were found to be functionally interacting with Wnt signaling pathways ( $p=10^{-11}$ ) and *UGCG* and *SERPINA1* to be regulated by protein-protein complex that consists of human  $\beta$ -catenin (7).

### **References:**

1. Estrada ea 2011 New genomic loci for bone mineral density, osteoporosis and risk of fracture. Submitted.
2. Pulendran B, Querec TD, Akondy RS, Lee EK, Cao WP, Nakaya HI, Teuwen D, Pirani A, Gernert K, Deng JS, Marzolf B, Kennedy K, Wu HY, Bennouna S, Oluoch H, Miller J, Vencio RZ, Mulligan M, Aderem A, Ahmed R 2009 Systems biology approach predicts immunogenicity of the yellow fever vaccine in humans. *Nature Immunology* **10**(1):116-125.
3. Calvano SE, Xiao WZ, Richards DR, Felciano RM, Baker HV, Cho RJ, Chen RO, Brownstein BH, Cobb JP, Tschoeke SK, Miller-Graziano C, Moldawer LL, Mindrinos MN, Davis RW, Tompkins RG, Lowry SF, Injury IHR 2005 A network-based analysis of systemic inflammation in humans (vol 437, pg 1032, 2005). *Nature* **438**(7068):696-696.
4. Leng RP, Wu H 2011 UBE4B, a ubiquitin chain assembly factor, is required for MDM2-mediated p53 polyubiquitination and degradation. *Cell Cycle* **10**(12):1912-1915.
5. Fuchs-Young R, Shirley SH, Rundhaug JE, Tian J, Cullinan-Ammann N, Lambert I, Conti CJ 2009 Transcriptional Regulation of Estrogen Receptor-alpha by p53 in Human Breast Cancer Cells. *Cancer Research* **69**(8):3405-3414.
6. Kanis JA, Stevenson M, McCloskey EV, Davis S, Lloyd-Jones M 2007 Glucocorticoid-induced osteoporosis: a systematic review and cost-utility analysis. *Health Technology Assessment* **11**(7):1-+.
7. Cho KR, Schwartz DR, Wu R, Kardia SLR, Levin AM, Huang CC, Shedden KA, Kuick R, Misek DE, Hanash SM, Taylor JMG, Reed H, Hendrix N, Zhai Y, Fearon ER 2003 Novel candidate targets of beta-catenin/T-cell factor signaling identified by gene expression profiling of ovarian endometrioid adenocarcinomas. *Cancer Research* **63**(11):2913-2922.

# Supplementary Figure S1. Genome-wide association plots

## (a) FNBMD

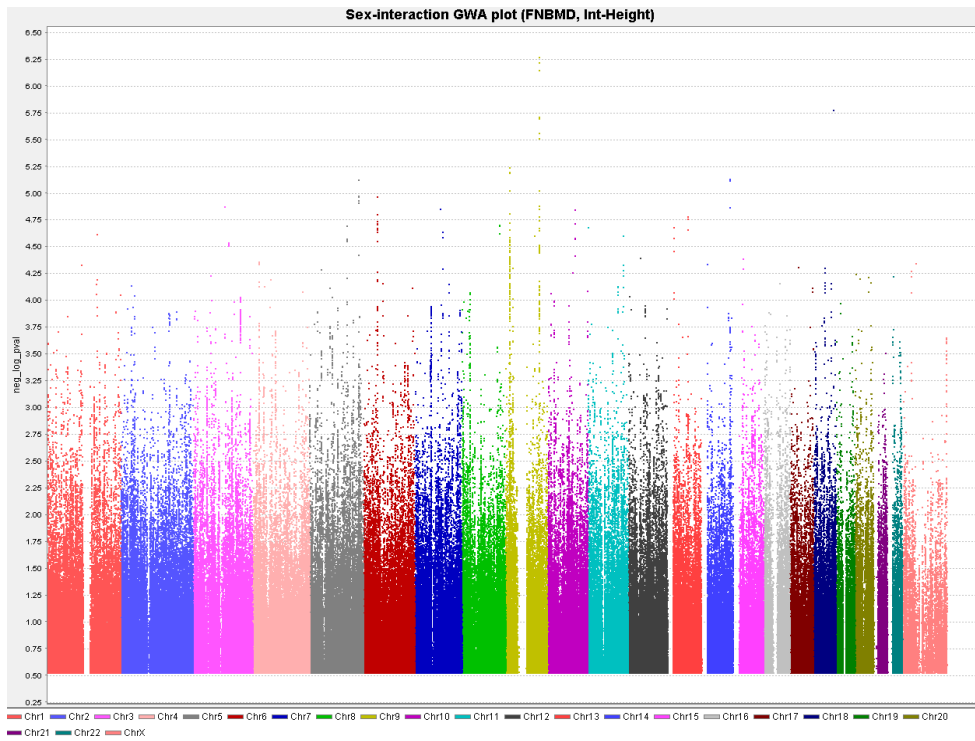

## (b) LSBMD

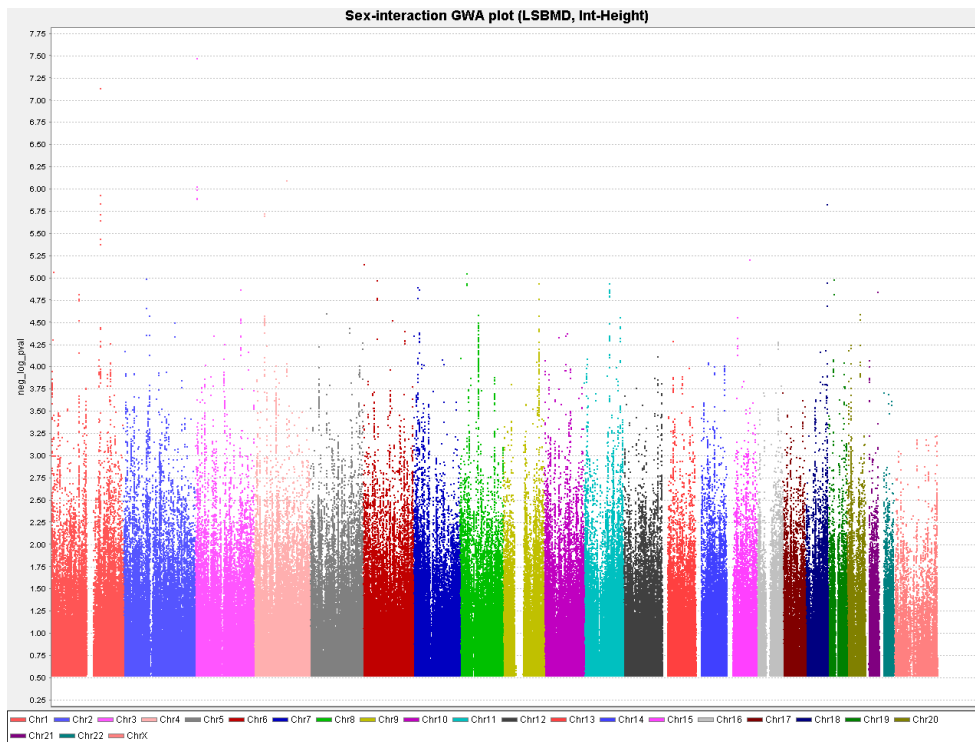

Supplementary Figure S2. Quantile-quantile plots

(a)

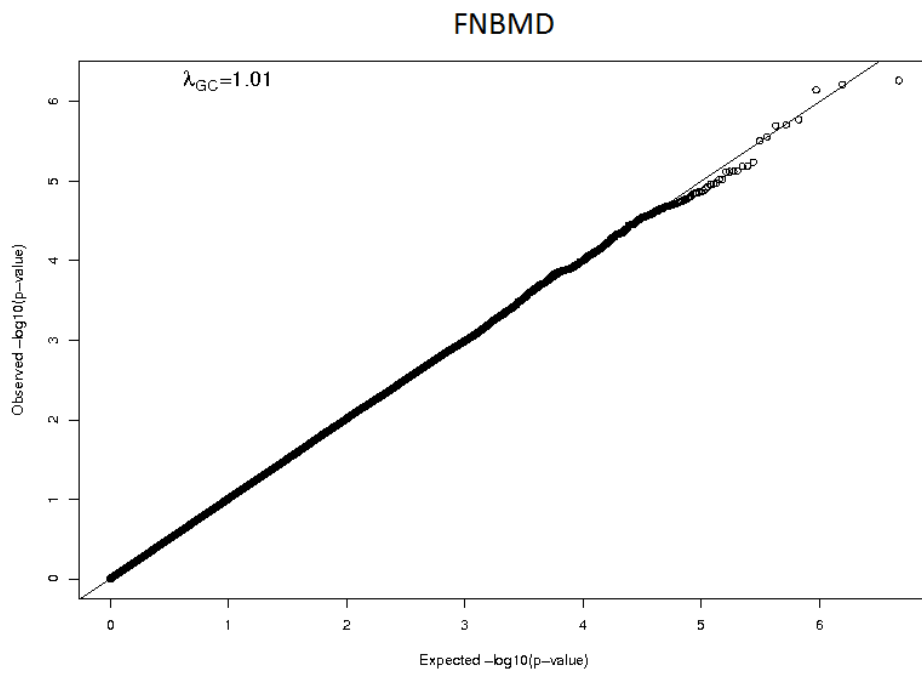

(b)

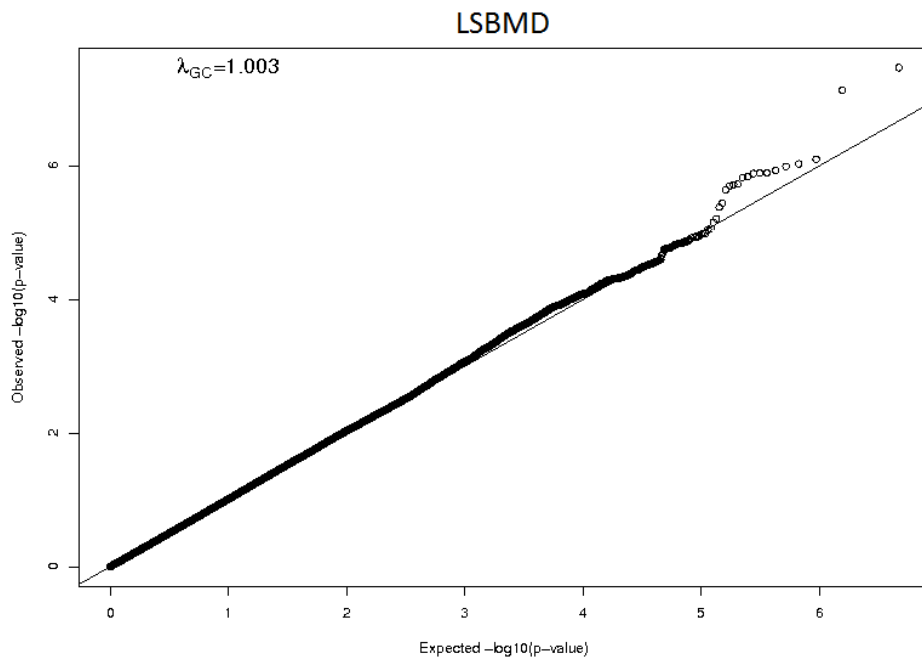

Supplementary Figure S3. Functional interaction network focusing on  $\beta$ -estradiol

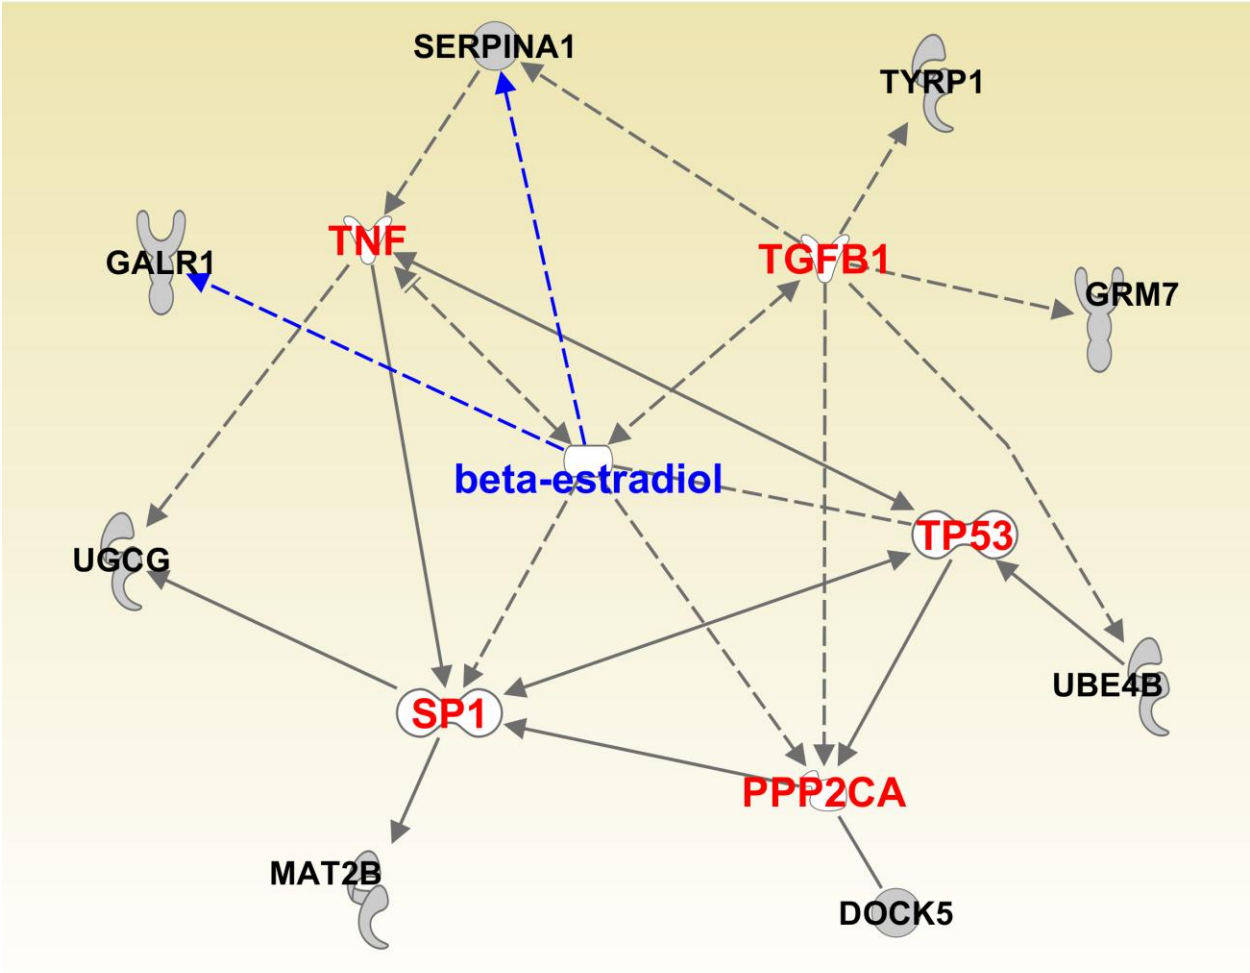

Supplementary Figure S4. Functional interaction network focusing on Wnt signaling

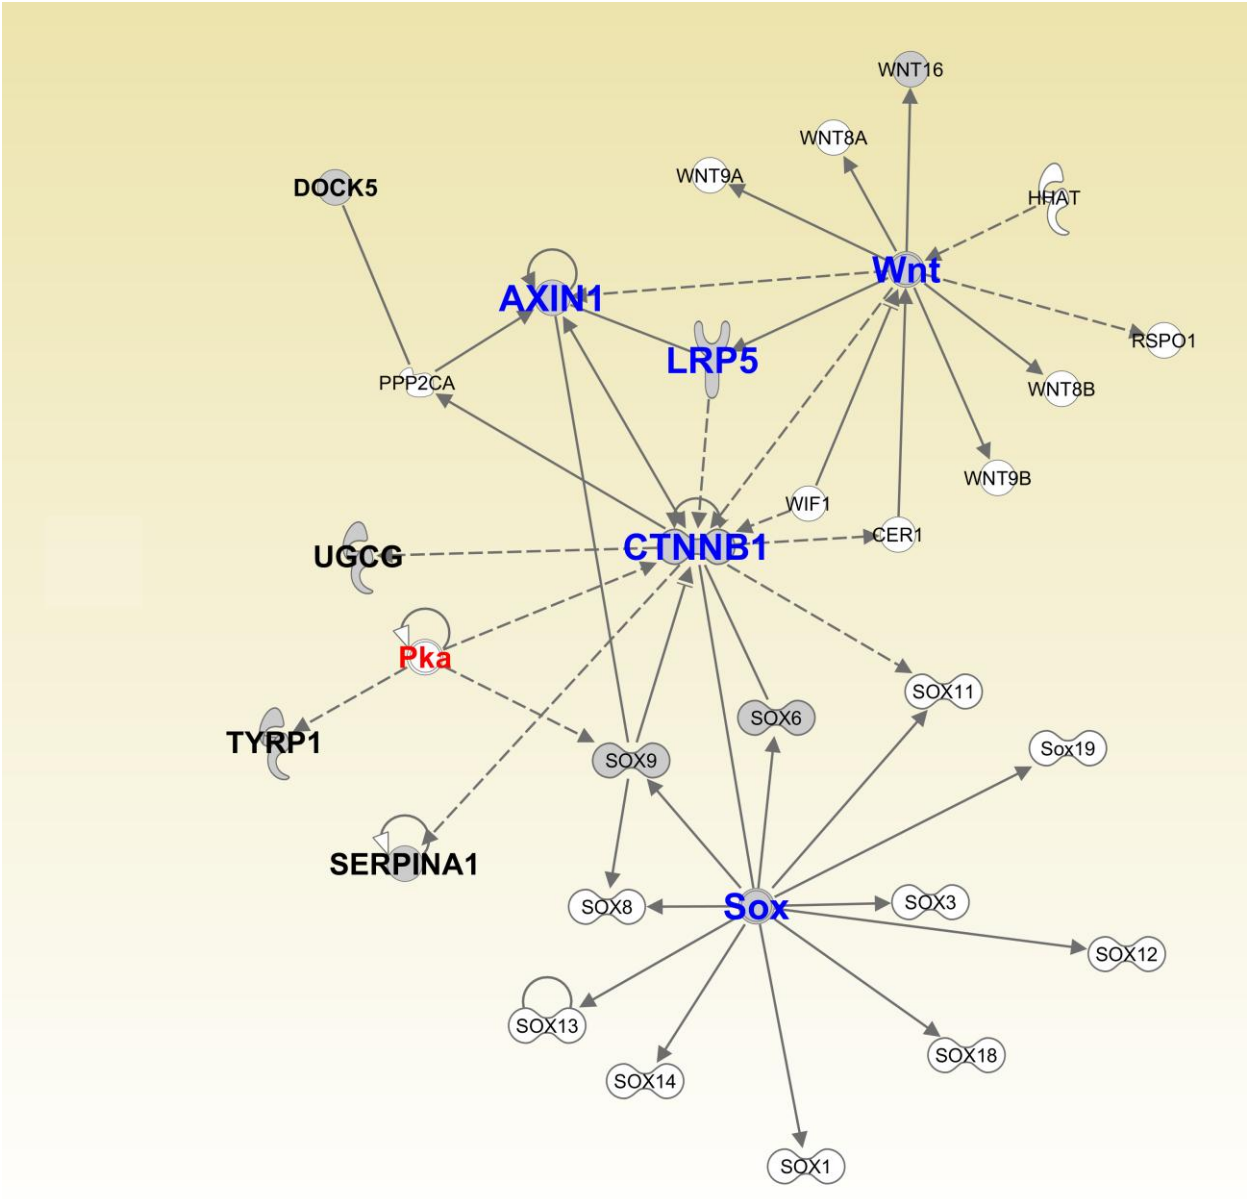



**Supplementary Table S1. Description of Participating Cohorts**

| Study                             | Gender   | N    | Age         |               | Height (cm)   | Weight (kg) | FNBMD                | LSBMD                |
|-----------------------------------|----------|------|-------------|---------------|---------------|-------------|----------------------|----------------------|
|                                   |          |      | (yrs)       | (yrs)         |               |             | (g/cm <sup>2</sup> ) | (g/cm <sup>2</sup> ) |
|                                   |          |      | mean (SD)   | mean (SD)     | mean (SD)     | mean (SD)   | mean (SD)            |                      |
| <b><i>Discovery Cohorts</i></b>   |          |      |             |               |               |             |                      |                      |
| AMISH                             | Males    | 443  | 51.3 (15.5) | 171.00 (6.40) | 77.90 (12.20) | 0.85 (0.13) | 0.97 (0.13)          |                      |
|                                   | Females  | 475  | 52.2 (14.6) | 160.00 (5.90) | 72.20 (14.50) | 0.82 (0.14) | 0.94 (0.15)          |                      |
|                                   | Combined | 918  | 51.7 (15.1) | 165.00 (8.60) | 74.90 (13.70) | 0.84 (0.14) | 0.96 (0.14)          |                      |
| CHS                               | Males    | 340  | 77.0 ( 4.8) | 172.70 (6.50) | 78.40 (12.20) | 0.76 (0.14) | 1.12 (0.24)          |                      |
|                                   | Females  | 568  | 76.3 (4.2)  | 158.90 (6.40) | 65.80 (13.70) | 0.63 (0.11) | 0.91 (0.24)          |                      |
|                                   | Combined | 908  | 76.6 (4.4)  | 164.10 (9.30) | 70.50 (14.50) | 0.68 (0.14) | 0.99 (0.25)          |                      |
| DECODE                            | Males    | 1136 | 66.1 (14.2) | 176.50 (6.70) | 83.40 (14.40) | 0.80 (0.10) | 1.00 (0.20)          |                      |
|                                   | Females  | 6469 | 59.7 (13.8) | 164.40 (6.20) | 71.10 (13.40) | 0.70 (0.10) | 0.90 (0.20)          |                      |
|                                   | Combined | 7605 | 60.7 (13.9) | 166.21 (6.28) | 72.94 (13.55) | 0.71 (0.10) | 0.91 (0.20)          |                      |
| ERF                               | Males    | 908  | 48.8 (14.5) | 174.44 (7.23) | 83.00 (14.23) | 0.97 (0.15) | 1.17 (0.17)          |                      |
|                                   | Females  | 1191 | 47.7 (14.4) | 161.75 (6.60) | 69.18 (13.76) | 0.91 (0.13) | 1.12 (0.16)          |                      |
|                                   | Combined | 2099 | 48.2 (14.5) | 167.23 (9.32) | 75.21 (15.59) | 0.93 (0.14) | 1.15 (0.17)          |                      |
| FRAMINGHAM                        | Males    | 2561 | 54.9 (15.3) | 175.45 (7.10) | 86.54 (14.58) | 0.98 (0.15) | 1.31 (0.20)          |                      |
|                                   | Females  | 3240 | 55.8 (15.7) | 161.40 (6.83) | 69.57 (15.09) | 0.88 (0.16) | 1.17 (0.20)          |                      |
|                                   | Combined | 5801 | 55.4 (15.5) | 167.61 (9.85) | 77.06 (17.09) | 0.93 (0.16) | 1.23 (0.21)          |                      |
| HEALTHABC                         | Males    | 833  | 73.9 (2.9)  | 173.55 (6.40) | 81.51 (12.45) | 0.76 (0.12) | 1.07 (0.19)          |                      |
|                                   | Females  | 734  | 73.6 (2.8)  | 159.44 (5.88) | 66.31 (12.15) | 0.65 (0.11) | 0.91 (0.17)          |                      |
|                                   | Combined | 1567 | 73.8 (2.8)  | 166.94 (9.36) | 74.39 (14.46) | 0.71 (0.13) | 1.00 (0.20)          |                      |
| RS I                              | Males    | 2110 | 68.1 (8.2)  | 174.85 (6.76) | 78.58 (10.74) | 0.92 (0.14) | 1.17 (0.20)          |                      |
|                                   | Females  | 2794 | 70.3 (9.6)  | 161.33 (6.65) | 69.59 (11.29) | 0.83 (0.14) | 1.04 (0.18)          |                      |
|                                   | Combined | 4904 | 69.4 (9.0)  | 167.14 (6.70) | 73.46 (11.06) | 0.87 (0.14) | 1.10 (0.19)          |                      |
| RS II                             | Males    | 781  | 63.7 (6.8)  | 176.05 (6.47) | 83.50 (11.40) | 0.97 (0.13) | 1.21 (0.19)          |                      |
|                                   | Females  | 898  | 63.8 (7.4)  | 162.87 (6.19) | 72.80 (12.50) | 0.89 (0.14) | 1.11 (0.19)          |                      |
|                                   | Combined | 1679 | 63.8 (7.1)  | 169.00 (6.32) | 77.78 (12.00) | 0.93 (0.14) | 1.16 (0.19)          |                      |
| <b><i>Replication Cohorts</i></b> |          |      |             |               |               |             |                      |                      |
| RS III                            | Males    | 528  | 56.1 (5.5)  | 178.80 (6.70) | 89.70 (14.10) | 1.00 (0.10) | 1.20 (0.20)          |                      |
|                                   | Females  | 683  | 56.1 (5.5)  | 165.00 (6.20) | 75.20 (14.30) | 0.90 (0.10) | 1.20 (0.20)          |                      |
|                                   | Combined | 1211 | 56.1 (5.5)  | 171.02 (6.42) | 81.52 (14.21) | 0.94 (0.10) | 1.20 (0.20)          |                      |
| SAFOS                             | Males    | 370  | 42.4 (15.5) | 170.68 (6.47) | 85.71 (17.83) | 0.90 (0.15) | 1.05 (0.13)          |                      |
|                                   | Females  | 611  | 44.2 (15.3) | 156.75 (6.38) | 76.65 (18.03) | 0.84 (0.14) | 1.01 (0.14)          |                      |
|                                   | Combined | 981  | 43.5 (15.4) | 162.00 (9.31) | 80.07 (18.48) | 0.87 (0.14) | 1.02 (0.14)          |                      |
| TWINS UK 1                        | Females  | 2174 | 61.4 (12.2) | 162.12 (6.20) | 67.27 (12.23) | 0.81 (0.13) | 1.00 (0.15)          |                      |
| TWINS UK 23                       | Males    | 473  | 58.9 (12.6) | 175.26 (6.39) | 81.85 (11.69) | 0.87 (0.14) | 1.03 (0.15)          |                      |
|                                   | Females  | 3029 | 61.4 (12.2) | 162.12 (6.20) | 67.27 (12.23) | 0.80 (0.14) | 0.99 (0.15)          |                      |
|                                   | Combined | 3502 | 61.4 (12.2) | 162.39 (6.47) | 67.57 (12.39) | 0.81 (0.14) | 0.99 (0.15)          |                      |
| HKOS                              | Females  | 800  | 48.9 (15.5) | 155.11 (6.71) | 54.74 (10.27) | 0.70 (0.17) | 0.89 (0.21)          |                      |
| GOOD                              | Males    | 938  | 18.9 (0.56) | 181.40 (6.75) | 73.84 (11.89) | 1.17 (0.16) | 1.21 (0.15)          |                      |
| AROS                              | Males    | 171  | 54.3 (15.7) | 176.20 (7.40) | 78.10 (12.40) | 0.70 (0.10) | 0.90 (0.20)          |                      |
|                                   | Females  | 605  | 61.8 (12.9) | 161.70 (6.70) | 63.80 (11.00) | 0.70 (0.10) | 0.80 (0.20)          |                      |
|                                   | Combined | 776  | 60.1 (13.9) | 165.00 (9.00) | 66.77 (12.71) | 0.67 (0.14) | 0.84 (0.18)          |                      |

|                    |          |      |             |                |               |             |             |
|--------------------|----------|------|-------------|----------------|---------------|-------------|-------------|
| <b>BARCOS</b>      | Females  | 1443 | 65.5 (9.1)  | 157.00 (6.00)  | 64.95 (10.48) | 0.69 (0.11) | 0.86 (0.15) |
| <b>CABRIO-C</b>    | Males    | 529  | 63.9 (8.5)  | 168.20 (6.10)  | 81.50 (11.00) | 0.80 (0.10) | 1.00 (0.20) |
|                    | Females  | 902  | 62.0 (9.8)  | 155.90 (6.00)  | 68.70 (12.00) | 0.70 (0.10) | 0.90 (0.10) |
|                    | Combined | 1431 | 62.7 (9.4)  | 161.00 (8.00)  | 73.58 (13.16) | 0.76 (0.13) | 0.96 (0.15) |
| <b>CAIFOS</b>      | Females  | 1082 | 80.2 (2.7)  | 158.00 (6.00)  | 67.64 (12.10) | 0.68 (0.10) | 0.95 (0.18) |
| <b>CAMOS</b>       | Males    | 715  | 65.4 (16.6) | 174.10 (7.10)  | 81.70 (13.40) | 0.80 (0.10) | 1.00 (0.20) |
|                    | Females  | 1593 | 67.3 (14.9) | 160.60 (6.40)  | 69.40 (13.70) | 0.70 (0.10) | 1.00 (0.20) |
|                    | Combined | 2308 | 57.9 (14.0) | 165.00 (9.00)  | 73.03 (14.40) | 0.76 (0.13) | 0.98 (0.17) |
| <b>DOPS</b>        | Females  | 1710 | 50.6 (2.8)  | 165.00 (6.00)  | 67.72 (11.84) | 0.80 (0.11) | 1.03 (0.14) |
| <b>EDOS</b>        | Males    | 354  | 62.4 (13.6) | 170.60 (8.80)  | 77.30 (17.20) | 0.70 (0.10) | 0.90 (0.20) |
|                    | Females  | 1615 | 66.2 (12.4) | 158.00 (7.10)  | 65.10 (13.70) | 0.60 (0.10) | 0.80 (0.20) |
|                    | Combined | 1969 | 65.5 (12.8) | 160.00 (9.00)  | 67.30 (15.15) | 0.64 (0.13) | 0.81 (0.18) |
| <b>FLOS</b>        | Males    | 159  | 53.9 (14.7) | 175.60 (7.00)  | 80.80 (13.60) | 0.80 (0.20) | 1.00 (0.10) |
|                    | Females  | 834  | 60.9 (12.0) | 160.00 (6.70)  | 61.80 (9.30)  | 0.70 (0.20) | 0.90 (0.20) |
|                    | Combined | 993  | 59.8 (12.7) | 163.00 (9.00)  | 64.83 (12.30) | 0.72 (0.17) | 0.89 (0.18) |
| <b>GEOS</b>        | Females  | 2377 | 53.8 (9.6)  | 159.00 (6.00)  | 64.99 (11.86) | 0.88 (0.14) | 1.11 (0.17) |
| <b>GEVUR</b>       | Males    | 75   | 59.2 (12.9) | 170.80 (7.50)  | 76.20 (14.00) | 0.90 (0.20) | 0.90 (0.20) |
|                    | Females  | 397  | 62.2 (8.2)  | 159.30 (6.30)  | 70.60 (13.20) | 0.80 (0.20) | 0.90 (0.20) |
|                    | Combined | 472  | 61.8 (9.0)  | 161.00 (7.00)  | 71.25 (13.37) | 0.78 (0.17) | 0.89 (0.18) |
| <b>GROS</b>        | Males    | 41   | 70.2 (12.8) | 164.80 (10.40) | 71.50 (12.30) | 0.80 (0.20) | 0.90 (0.20) |
|                    | Females  | 252  | 69.1 (11.7) | 161.80 (7.30)  | 71.70 (10.90) | 0.80 (0.10) | 0.80 (0.20) |
|                    | Combined | 293  | 69.3 (11.8) | 162.00 (8.00)  | 71.68 (11.12) | 0.80 (0.15) | 0.82 (0.17) |
| <b>MrOS Sweden</b> | Males    | 2893 | 75.4 (3.2)  | 175.00 (7.00)  | 80.70 (12.07) | 0.85 (0.15) | 1.15 (0.22) |
| <b>OAS</b>         | Males    | 589  | 68.1 (4.2)  | 174.00 (7.00)  | 83.70 (12.53) | 0.76 (0.11) | 1.05 (0.17) |
| <b>SLO-PREVAL</b>  | Males    | 121  | 67.9 (6.5)  | 171.70 (6.30)  | 81.60 (12.60) | 0.80 (0.20) | 1.00 (0.20) |
|                    | Females  | 590  | 62.1 (10.6) | 160.40 (6.30)  | 69.10 (12.20) | 0.70 (0.10) | 0.90 (0.20) |
|                    | Combined | 711  | 63.1 (10.3) | 162.00 (8.00)  | 71.24 (13.12) | 0.71 (0.13) | 0.90 (0.17) |

Supplementary Table S2. Genotype, Imputation and Sample QC information for Participating Cohorts

| Study                        | Genotyping                                                |                     | SNP Inclusion criteria |           |                    | SNP Imputation |              |       | Samples                             |                         | Association       |                      |                                                                                                                                                                                                                                                                                                                           |                    |
|------------------------------|-----------------------------------------------------------|---------------------|------------------------|-----------|--------------------|----------------|--------------|-------|-------------------------------------|-------------------------|-------------------|----------------------|---------------------------------------------------------------------------------------------------------------------------------------------------------------------------------------------------------------------------------------------------------------------------------------------------------------------------|--------------------|
|                              | Platform(s) / Chip(s)                                     | Calling Algorithm   | MAF                    | Call Rate | P-test HWE         | Included SNPs  | Method       | MAF   | Quality metric                      | Total # SNPs            | Genotyped samples | Call rate* selection | Sample QC / Other exclusions                                                                                                                                                                                                                                                                                              | Software           |
| <b>Discovery Cohorts</b>     |                                                           |                     |                        |           |                    |                |              |       |                                     |                         |                   |                      |                                                                                                                                                                                                                                                                                                                           |                    |
| AMISH                        | Affymetrix / 500K or 6.0                                  | Birdseed            | ≥ 1%                   | 95%       | >10 <sup>-6</sup>  | 338,598        | MACH         | ≥ 1%  | MACH R2                             | 2543013                 | 1213              | >95.0%               | 1. Missing BMD data. 2 Missing Covariate                                                                                                                                                                                                                                                                                  | MMAP (J.O'Connell) |
| CHS                          | Illumina 370CNV                                           | BeadStudio          | > 1%                   | ≥97%      | > 10 <sup>-5</sup> | 306,655        | BimBam       | ≥1%   | Variance on the allele dosage >0.01 | 2,335,99                | 3291              | >95%                 | 1) presence at study baseline of coronary heart disease, congestive heart failure, peripheral vascular disease, valvular heart disease, stroke or transient ischemic attack;<br>2) missing DNA;<br>3) non-Caucasian ethnicity;<br>4) gender mismatch;<br>5) discordance with prior genotyping.                            | R                  |
| DECODE                       | Illumina HH300 and 370CNV                                 | BeadStudio          | > 1%                   | > 96%     | > 10 <sup>-6</sup> | 281,410        | IMPUTE       | ≥1%   | MACH R2 ≥ 0.3                       | 2,454,808               | 7605              | ≥91%                 | 1) missing BMD measurement;<br>2) missing body weight and height.                                                                                                                                                                                                                                                         | SNPTEST            |
| ERF                          | Illumina                                                  | Beadstudio          | >0.5%                  | >98%      | ≥ 10 <sup>-6</sup> |                | MACH         |       |                                     |                         | 1602              | >95%                 | 1) gender mismatch;<br>2) ethnic outliers;<br>3) Missing phenotype data;<br>4) high IBS;<br>5) excess heterozygosity.                                                                                                                                                                                                     | ProbABEL           |
|                              | Affymetrix                                                | BRLMM               | >1%                    | >95%      | ≥ 10 <sup>-6</sup> | upto 487,573   | MACH         |       | O/E Variance                        | 2543887                 | 2385              | >95%                 | 1) high IBS<br>2) high autosomal heterozygosity<br>3) ethnic outliers<br>4) missing trait<br>5) sex mismatch                                                                                                                                                                                                              |                    |
| FRAMINGHAM                   | Affymetrix 500K Dual GeneChip + 50K gene-centered MOP set | BRLMM               | ≥ 1%                   | ≥ 97%     | ≥ 10 <sup>-6</sup> | 378163         | MACH         | ≥ 1%  | (O/E)σ <sup>2</sup> ratio ≥ 0.3     | 2540224                 | 9274              | ≥ 97.0%              | 1. autosomal heterozygosity <0.33 or > 0.37<br>2. ethnic outliers (using Eigenstraat)<br>3. missing BMD or weight measurements                                                                                                                                                                                            | Kinship R-Package  |
| HEALTHABC                    | Illumina Human1M-Duo BeadC                                | Illumina BeadStudio | >1%                    | >97%      | >10e-6             | 914,263        | MACH v1.0.16 |       | O/E Variance                        | 2,543,887               | 1663              | ≥ 97.0%              | 1) Missing DNA<br>2) 1st or 2nd degree relatives<br>3) missing body weight and height<br>4)ethnic outliers                                                                                                                                                                                                                | ProbABEL           |
| RS I                         | Illumina / HumanHap 550K V.3 ADHumanHap 550 V.3 DUO;      | Beadstudio Genecall | ≥ 1%                   | ≥ 97.5%   | > 10 <sup>-6</sup> | 512,349        | MACH         | ≥1%   | MACH R2 ≥ 0.3                       | 2,448,227               | 5,746             | ≥ 97.5%              | 1) missing DNA;<br>2) gender mismatch with typed X-linked markers;<br>3) excess autosomal heterozygosity > 0.336-FDR>0.1%;<br>4) duplicates and/or 1st or 2nd degree relatives using IBS probabilities >97% from PLINK;<br>5) ethnic outliers using IBS distances > 3SD from PLINK;<br>6) Missing body weight and height. | MACH2QTL via GRIMP |
| RS II                        | Illumina / HumanHap 550K V.3 ADHumanHap 550 V.3 DUO;      | Beadstudio Genecall | ≥ 1%                   | ≥ 97.5%   | > 10 <sup>-6</sup> | 466,389        | MACH         | ≥1%   | MACH R2 ≥ 0.3                       | 2,448,227               | 2,157             | ≥ 97.5%              | 1) missing DNA;<br>2) gender mismatch with typed X-linked markers;<br>3) excess autosomal heterozygosity > 0.336-FDR>0.1%;<br>4) duplicates and/or 1st or 2nd degree relatives using IBS probabilities >97% from PLINK;<br>5) ethnic outliers using IBS distances > 3SD from PLINK;<br>6) Missing body weight and height. | MACH2QTL via GRIMP |
| <b>Replication Cohorts</b>   |                                                           |                     |                        |           |                    |                |              |       |                                     |                         |                   |                      |                                                                                                                                                                                                                                                                                                                           |                    |
| <b>In-silico replication</b> |                                                           |                     |                        |           |                    |                |              |       |                                     |                         |                   |                      |                                                                                                                                                                                                                                                                                                                           |                    |
| RS III                       | Illumina / HumanHap610                                    | Beadstudio Genecall | ≥ 1%                   | ≥ 97.5%   | > 10 <sup>-6</sup> | 514,073        | MACH         | ≥1%   | MACH R2 ≥ 0.3                       | 2,448,227               | 1212              | ≥ 97.5%              | 1) missing DNA;<br>2) gender mismatch with typed X-linked markers;<br>3) excess autosomal heterozygosity > 0.336-FDR>0.1%;<br>4) duplicates and/or 1st or 2nd degree relatives using IBS probabilities >97% from PLINK;<br>5) ethnic outliers using IBS distances > 3SD from PLINK;<br>6) Missing body weight and height. | MACH2QTL via GRIMP |
| SAFOS                        | Illumina HumanHap 550                                     | Beadstudio          | ≥ 1%                   | ≥ 95%     | > 10 <sup>-6</sup> | 531,800        | MACH         | ≥ 1%  | MACH R2 ≥ 0.3                       | 1,387,467               | 1860              | ≥ 95%                | 1) Missing BMD measurements. 2) Missing covariate data                                                                                                                                                                                                                                                                    | MMAP (J.O'Connell) |
| TWINS UK                     | Illumina HumanHap 300 & 550. Illumina HumanCNV370 Duo     | Beadstudio Genecall | ≥ 1%                   | ≥ 95%     | > 10 <sup>-6</sup> | 313,575        | IMPUTE       | ≥1%   | Prop_info >0.4                      | 2,561,701               | 1511              | ≥ 95%                | 1) autosomal heterozygosity <0.33 or > 0.37;<br>2) ethnic outliers (using STRUCTURE);<br>3) missing BMD or weight measurements.                                                                                                                                                                                           | GenABEL            |
| TWINS UK-23                  | Illumina 610k                                             | Beadstudio Genecall | ≥ 1%                   | ≥ 95%     | > 10 <sup>-6</sup> | 545,026        | IMPUTE       | ≥1%   | Prop_info >0.4                      | 2,561,701               | 2801              | ≥ 95%                |                                                                                                                                                                                                                                                                                                                           | GenABEL            |
| HKOS                         | Human610-Quad Chip                                        | Illumina BeadStudio | ≥0.01                  | ≥95%      | ≥10e-6             | 489,068        | IMPUTE       | ≥0.01 | proper_info>=0.3                    | 2,426,092 for autosomal | 800               | 95%                  | (1) genotyping call rate less than 95% ; (2) autosomal heterozygosity less than 28% or more than 30% ; (3) being related or identical to other individuals in the sample and (4) discordance of observed gender and estimated gender .                                                                                    | SNPTEST v2.2.0     |
| GOOD                         | Illumina610                                               | BeadStudio          | ≥ 1%                   | >98%      | >10 <sup>-6</sup>  | 521,160        | MACH 1.0     |       | MACH R2                             | 2,543,887               | 938               | 98%                  | 1) heterozygosity > 33%;<br>2) ethnic outliers<br>3) related individuals and duplicates                                                                                                                                                                                                                                   | GRIMP              |
| <b>De novo genotyped</b>     |                                                           |                     |                        |           |                    |                |              |       |                                     |                         |                   |                      |                                                                                                                                                                                                                                                                                                                           |                    |
| GENOMOS                      | KASPar assay                                              | SNPviewer2          | ≥ 1%                   | >90%      | > 10 <sup>-6</sup> | 12             | NA           | NA    | NA                                  | NA                      | 27715             | 80%                  | Discordance of observed gender and estimated gender .                                                                                                                                                                                                                                                                     | Plink v1.07        |

**Supplementary Table 3. Investigation of Sex-by-Gene Interaction for 56 BMD-related Loci**

| SNP        | Locus     | Closest Gene | EA/No Allele |       |         |        | FNBMD                 |         |        |                       | LSBMD |  |  |
|------------|-----------|--------------|--------------|-------|---------|--------|-----------------------|---------|--------|-----------------------|-------|--|--|
|            |           |              | n-EA         | Freq  | Beta    | SE     | P-value               | Beta    | SE     | P-value               |       |  |  |
| rs12407028 | 1p31.3    | GPR177       | t/c          | 0.593 | -0.0006 | 0.0024 | 8.00×10 <sup>-1</sup> | 0.0008  | 0.0036 | 8.24×10 <sup>-1</sup> |       |  |  |
| rs6426749  | 1p36.12   | ZBTB40       | c/g          | 0.170 | 0.001   | 0.0032 | 7.53×10 <sup>-1</sup> | -0.0037 | 0.0047 | 4.32×10 <sup>-1</sup> |       |  |  |
| rs479336   | 1q24.3    | DNM3         | t/g          | 0.747 | -0.001  | 0.0027 | 7.20×10 <sup>-1</sup> | 0.0043  | 0.0041 | 2.95×10 <sup>-1</sup> |       |  |  |
| rs3790160  | 20p12.2   | JAG1         | t/c          | 0.508 | 0.0007  | 0.0024 | 7.67×10 <sup>-1</sup> | -0.0009 | 0.0036 | 8.07×10 <sup>-1</sup> |       |  |  |
| rs4233949  | 2p16.2    | SPTBN1       | c/g          | 0.377 | 0.0009  | 0.0025 | 7.23×10 <sup>-1</sup> | -0.0009 | 0.0037 | 8.07×10 <sup>-1</sup> |       |  |  |
| rs7584262  | 2p21      | LOC91461     | t/c          | 0.248 | 0.0059  | 0.0028 | 3.56×10 <sup>-2</sup> | 0.0012  | 0.0041 | 7.75×10 <sup>-1</sup> |       |  |  |
| rs17040773 | 2q13      | ANAPC1       | a/c          | 0.759 | 0.0024  | 0.003  | 4.18×10 <sup>-1</sup> | 0.0021  | 0.0044 | 6.30×10 <sup>-1</sup> |       |  |  |
| rs1878526  | 2q14.2    | INSIG2       | a/g          | 0.215 | -0.0031 | 0.0029 | 3.00×10 <sup>-1</sup> | -0.0098 | 0.0043 | 2.31×10 <sup>-2</sup> |       |  |  |
| rs1346004  | 2q24.3    | GALNT3       | a/g          | 0.499 | -0.0023 | 0.0025 | 3.46×10 <sup>-1</sup> | -0.0075 | 0.0035 | 3.48×10 <sup>-2</sup> |       |  |  |
| rs430727   | 3p22.1    | CTNNB1       | t/c          | 0.470 | -0.0012 | 0.0024 | 6.05×10 <sup>-1</sup> | -0.0061 | 0.0036 | 8.35×10 <sup>-2</sup> |       |  |  |
| rs1026364  | 3q13.2    | KIAA2018     | t/g          | 0.378 | -0.003  | 0.0025 | 2.28×10 <sup>-1</sup> | -0.0021 | 0.0036 | 5.60×10 <sup>-1</sup> |       |  |  |
| rs344081   | 3q25.31   | LEKR1        | t/c          | 0.868 | 0.0136  | 0.0036 | 1.31×10 <sup>-4</sup> | 0.0105  | 0.0051 | 3.92×10 <sup>-2</sup> |       |  |  |
| rs3755955  | 4p16.3    | IDUA         | a/g          | 0.152 | -0.0069 | 0.004  | 8.17×10 <sup>-2</sup> | -0.006  | 0.0059 | 3.14×10 <sup>-1</sup> |       |  |  |
| rs6532023  | 4q22.1    | MEPE         | t/g          | 0.339 | -0.0025 | 0.0025 | 3.01×10 <sup>-1</sup> | -0.0021 | 0.0036 | 5.65×10 <sup>-1</sup> |       |  |  |
| rs1366594  | 5q14.3    | MEF2C        | a/c          | 0.543 | 0.0007  | 0.0023 | 7.56×10 <sup>-1</sup> | -0.0012 | 0.0034 | 7.20×10 <sup>-1</sup> |       |  |  |
| rs11755164 | 6p21.1    | SUPT3H       | t/c          | 0.410 | 0.002   | 0.0025 | 4.27×10 <sup>-1</sup> | -0.0006 | 0.0037 | 8.77×10 <sup>-1</sup> |       |  |  |
| rs9466056  | 6p22.3    | CDKAL1       | a/g          | 0.382 | -0.0051 | 0.0024 | 3.36×10 <sup>-2</sup> | -0.01   | 0.0036 | 5.09×10 <sup>-3</sup> |       |  |  |
| rs13204965 | 6q22.32   | RSPO3        | a/c          | 0.762 | -0.0061 | 0.0029 | 3.59×10 <sup>-2</sup> | -0.0023 | 0.0043 | 5.82×10 <sup>-1</sup> |       |  |  |
| rs4869742  | 6q25.1    | C6orf97/ESR1 | t/c          | 0.302 | -0.001  | 0.0025 | 7.01×10 <sup>-1</sup> | -0.0014 | 0.0038 | 7.19×10 <sup>-1</sup> |       |  |  |
| rs6959212  | 7p14.1    | STARD3NL     | t/c          | 0.320 | -0.0008 | 0.0025 | 7.55×10 <sup>-1</sup> | -0.0006 | 0.0037 | 8.69×10 <sup>-1</sup> |       |  |  |
| rs4727338  | 7q21.3    | SLC25A13     | c/g          | 0.656 | 0.0006  | 0.0024 | 7.90×10 <sup>-1</sup> | 0.0065  | 0.0037 | 7.39×10 <sup>-2</sup> |       |  |  |
| rs3801387  | 7q31.31   | WNT16        | a/g          | 0.732 | 0.0031  | 0.0027 | 2.42×10 <sup>-1</sup> | 0.0083  | 0.004  | 3.78×10 <sup>-2</sup> |       |  |  |
| rs7812088  | 7q36.1    | ABCF2        | a/g          | 0.128 | 0.0013  | 0.0036 | 7.25×10 <sup>-1</sup> | 0.004   | 0.0054 | 4.57×10 <sup>-1</sup> |       |  |  |
| rs7017914  | 8q13.3    | XKR9         | a/g          | 0.481 | -0.0054 | 0.0023 | 2.04×10 <sup>-2</sup> | -0.0089 | 0.0034 | 9.74×10 <sup>-3</sup> |       |  |  |
| rs2062377  | 8q24.12   | TNFRSF11B    | a/t          | 0.563 | -0.0048 | 0.0024 | 4.47×10 <sup>-2</sup> | -0.0003 | 0.0035 | 9.31×10 <sup>-1</sup> |       |  |  |
| rs7851693  | 9q34.11   | FUBP3        | c/g          | 0.656 | 0.0002  | 0.0025 | 9.46×10 <sup>-1</sup> | -0.0025 | 0.0038 | 5.12×10 <sup>-1</sup> |       |  |  |
| rs3905706  | 10p11.23  | MPP7         | t/c          | 0.201 | 0.0001  | 0.003  | 9.62×10 <sup>-1</sup> | -0.0034 | 0.0043 | 4.36×10 <sup>-1</sup> |       |  |  |
| rs1373004  | 10q21.1   | MBL2         | t/g          | 0.125 | 0.0062  | 0.0039 | 1.07×10 <sup>-1</sup> | 0.0139  | 0.0057 | 1.44×10 <sup>-2</sup> |       |  |  |
| rs7071206  | 10q22.3_1 | KCNMA1       | t/c          | 0.788 | 0.0025  | 0.0029 | 3.92×10 <sup>-1</sup> | 0.0031  | 0.0043 | 4.65×10 <sup>-1</sup> |       |  |  |
| rs7084921  | 10q24.2   | CPN1         | t/c          | 0.398 | -0.0039 | 0.0025 | 1.15×10 <sup>-1</sup> | 0.0023  | 0.0035 | 5.06×10 <sup>-1</sup> |       |  |  |
| rs7932354  | 11p11.2   | ARHGAP1      | t/c          | 0.295 | -0.0012 | 0.0027 | 6.50×10 <sup>-1</sup> | -0.0025 | 0.0039 | 5.22×10 <sup>-1</sup> |       |  |  |
| rs10835187 | 11p14.1_1 | LIN7C        | t/c          | 0.556 | 0.0072  | 0.0024 | 2.34×10 <sup>-3</sup> | 0.007   | 0.0035 | 4.53×10 <sup>-2</sup> |       |  |  |
| rs163879   | 11p14.1_2 | DCDC5        | t/c          | 0.698 | 0.0009  | 0.0025 | 7.10×10 <sup>-1</sup> | 0.0056  | 0.0038 | 1.39×10 <sup>-1</sup> |       |  |  |
| rs7108738  | 11p15.2   | SOX6         | t/g          | 0.820 | 0.0013  | 0.003  | 6.76×10 <sup>-1</sup> | 0.0012  | 0.0045 | 7.96×10 <sup>-1</sup> |       |  |  |
| rs3736228  | 11q13.2   | LRP5         | t/c          | 0.160 | -0.0045 | 0.0033 | 1.72×10 <sup>-1</sup> | -0.005  | 0.0048 | 3.00×10 <sup>-1</sup> |       |  |  |
| rs7953528  | 12p11.22  | KLHDC5       | a/t          | 0.175 | 0.0034  | 0.0031 | 2.78×10 <sup>-1</sup> | 0.0087  | 0.0048 | 6.89×10 <sup>-2</sup> |       |  |  |
| rs2887571  | 12p13.33  | ERC1         | a/g          | 0.760 | 0.0024  | 0.0027 | 3.84×10 <sup>-1</sup> | 0       | 0.004  | 9.96×10 <sup>-1</sup> |       |  |  |
| rs12821008 | 12q13.12  | DHH          | t/c          | 0.380 | 0.0019  | 0.0025 | 4.50×10 <sup>-1</sup> | -0.0035 | 0.0037 | 3.48×10 <sup>-1</sup> |       |  |  |
| rs2016266  | 12q13.13  | SP7          | a/g          | 0.682 | -0.0002 | 0.0025 | 9.27×10 <sup>-1</sup> | 0.0062  | 0.0038 | 1.01×10 <sup>-1</sup> |       |  |  |
| rs1053051  | 12q23.3   | C12orf23     | t/c          | 0.515 | 0.0013  | 0.0023 | 5.78×10 <sup>-1</sup> | -0.0029 | 0.0035 | 4.06×10 <sup>-1</sup> |       |  |  |
| rs9533090  | 13q14.11  | AKAP11/RANK1 | t/c          | 0.483 | 0.0026  | 0.0024 | 2.71×10 <sup>-1</sup> | -0.001  | 0.0036 | 7.86×10 <sup>-1</sup> |       |  |  |
| rs1286083  | 14q32.12  | RPS6KA5      | t/c          | 0.814 | -0.0041 | 0.0031 | 1.82×10 <sup>-1</sup> | -0.006  | 0.0045 | 1.83×10 <sup>-1</sup> |       |  |  |
| rs11623869 | 14q32.32  | MARK3        | t/g          | 0.355 | 0.0019  | 0.0025 | 4.49×10 <sup>-1</sup> | 0.0035  | 0.0037 | 3.42×10 <sup>-1</sup> |       |  |  |
| rs4985155  | 16p13.11  | NTAN1        | a/g          | 0.678 | -0.0077 | 0.0025 | 1.96×10 <sup>-3</sup> | -0.0041 | 0.0038 | 2.80×10 <sup>-1</sup> |       |  |  |
| rs9921222  | 16p13.3_1 | AXIN1        | t/c          | 0.484 | 0.001   | 0.0025 | 6.80×10 <sup>-1</sup> | -0.0012 | 0.0036 | 7.42×10 <sup>-1</sup> |       |  |  |

|                   |            |           |     |       |         |        |                       |         |        |                       |
|-------------------|------------|-----------|-----|-------|---------|--------|-----------------------|---------|--------|-----------------------|
| rs13336428        | 16p13.3_2  | LOC390667 | a/g | 0.425 | 0.0006  | 0.0026 | $8.03 \times 10^{-1}$ | 0.0041  | 0.0038 | $2.80 \times 10^{-1}$ |
| rs1566045         | 16q12.1    | SALL1     | t/c | 0.796 | -0.0031 | 0.0035 | $3.80 \times 10^{-1}$ | 0.0025  | 0.0052 | $6.32 \times 10^{-1}$ |
| rs10048146        | 16q24.1    | FOXL1     | a/g | 0.809 | 0.0017  | 0.0032 | $5.93 \times 10^{-1}$ | 0.0014  | 0.0048 | $7.66 \times 10^{-1}$ |
| rs4790881         | 17p13.3    | SMG6      | a/c | 0.709 | 0.0033  | 0.0026 | $2.05 \times 10^{-1}$ | -0.0034 | 0.0039 | $3.77 \times 10^{-1}$ |
| rs227584          | 17q21.31_1 | C17orf53  | a/c | 0.711 | -0.0014 | 0.0027 | $5.95 \times 10^{-1}$ | -0.0041 | 0.0039 | $2.98 \times 10^{-1}$ |
| rs1864325         | 17q21.31_2 | MAPT      | t/c | 0.222 | 0.0003  | 0.0028 | $9.11 \times 10^{-1}$ | 0.0004  | 0.0042 | $9.24 \times 10^{-1}$ |
| rs7217932         | 17q24.3    | SOX9      | a/g | 0.471 | 0.0016  | 0.0024 | $4.96 \times 10^{-1}$ | 0.0003  | 0.0036 | $9.39 \times 10^{-1}$ |
| rs4796995         | 18p11.21   | C18orf19  | a/g | 0.637 | 0.0004  | 0.0024 | $8.68 \times 10^{-1}$ | 0.0045  | 0.0035 | $2.09 \times 10^{-1}$ |
| rs884205          | 18q21.33   | TNFRSF11A | a/c | 0.273 | 0.0002  | 0.0028 | $9.36 \times 10^{-1}$ | 0.0014  | 0.004  | $7.36 \times 10^{-1}$ |
| rs10416218        | 19q13.11   | GPATCH1   | t/c | 0.745 | 0.0022  | 0.0027 | $4.27 \times 10^{-1}$ | 0.0044  | 0.004  | $2.76 \times 10^{-1}$ |
| rs5934507*        | Xp22.31    | FAM9B     | a/g | 0.720 | -0.008  | 0.0044 | $6.67 \times 10^{-2}$ | -0.0159 | 0.0065 | $1.47 \times 10^{-2}$ |
| Secondary signals |            |           |     |       |         |        |                       |         |        |                       |
| rs17482952        | 1p31.3     | WLS       | a/g | 0.925 | -0.0011 | 0.0044 | $8.05 \times 10^{-1}$ | 0.0001  | 0.0068 | $9.92 \times 10^{-1}$ |
| rs7521902         | 1p36.12    | WNT4      | a/c | 0.216 | -0.0015 | 0.003  | $6.16 \times 10^{-1}$ | 0.001   | 0.0044 | $8.17 \times 10^{-1}$ |
| rs7751941         | 6q25.1     | C6orf97   | a/g | 0.209 | -0.001  | 0.0029 | $7.24 \times 10^{-1}$ | -0.0097 | 0.0043 | $2.42 \times 10^{-2}$ |
| rs10226308        | 7p14.1     | TXNDC3    | a/g | 0.808 | -0.0003 | 0.003  | $9.32 \times 10^{-1}$ | 0.007   | 0.0044 | $1.07 \times 10^{-1}$ |
| rs13245690        | 7q31.31    | C7orf58   | a/g | 0.599 | 0.001   | 0.0024 | $6.84 \times 10^{-1}$ | -0.0049 | 0.0037 | $1.81 \times 10^{-1}$ |
| rs736825          | 12q13.13   | HOXC6     | c/g | 0.625 | 0.0025  | 0.0026 | $3.26 \times 10^{-1}$ | 0.0028  | 0.0038 | $4.49 \times 10^{-1}$ |
| rs1564981         | 16q12.1    | CYLD      | a/g | 0.471 | 0.0019  | 0.0024 | $4.33 \times 10^{-1}$ | 0.0028  | 0.0035 | $4.18 \times 10^{-1}$ |
| rs4792909         | 17q21.31_1 | SOST      | t/g | 0.369 | -0.0028 | 0.0025 | $2.51 \times 10^{-1}$ | -0.0032 | 0.0036 | $3.79 \times 10^{-1}$ |
